# Supplementary material for: Systematic Review and Meta-Analysis of the Association between Ambient Nitrogen Dioxide and Respiratory Disease in China
Source: PubMed Central journal article supplement (PMC5486332; doi:10.3390/ijerph14060646), 2017-06-16
Supplement: ijerph-14-00646-s001.pdf [file ijerph-14-00646-s001.pdf]

# Systematic review and meta-analysis of the association between ambient nitrogen dioxide and respiratory disease in China

Figure S1. Flow chart for study retrieval and selection process

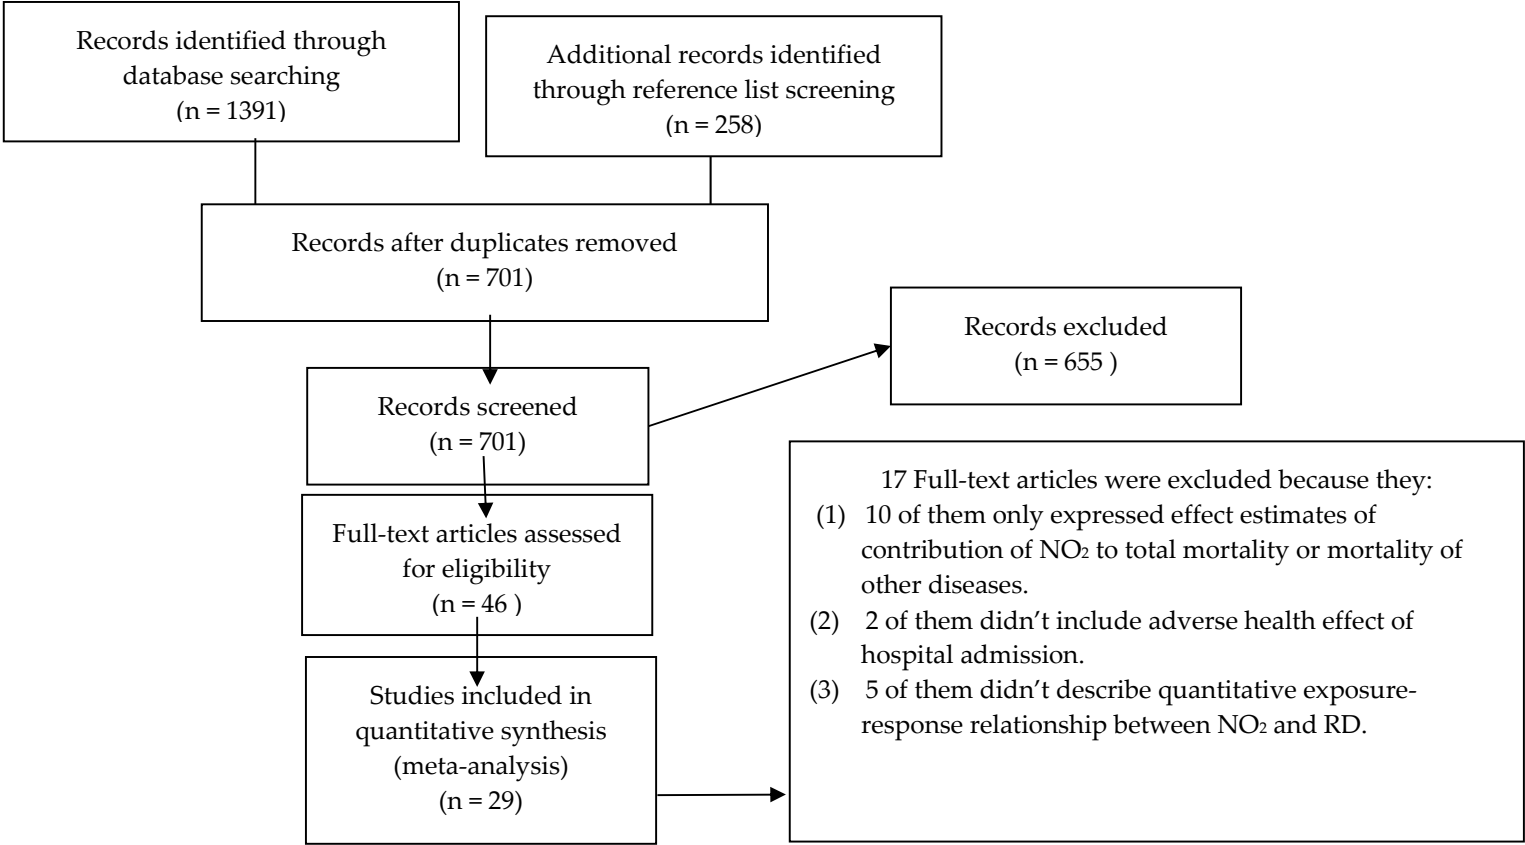

**Table S1** Quality assessment of included studies in the systematic review

| Number           | Author      | Diagnostic Evidence of Disease | Daily Pollutant Measurement | Long-term Trends | Seasonality | Meteorological Parameters <sup>1</sup> | DOW <sup>2</sup> | Public Holidays | Influenza Epidemics | Risk of Bias |
|------------------|-------------|--------------------------------|-----------------------------|------------------|-------------|----------------------------------------|------------------|-----------------|---------------------|--------------|
| <b>Mortality</b> |             |                                |                             |                  |             |                                        |                  |                 |                     |              |
| [32]             | Chen et     | ICD-10 <sup>5</sup>            | Y <sup>3</sup>              | Y                | Y           | Y                                      | Y                | N <sup>4</sup>  | N                   | Low          |
| [33]             | Zhang et    | ICD-10                         | Y                           | Y                | Y           | Y                                      | Y                | N               | N                   | Low          |
| [34]             | Zhang et    | ICD-10                         | Y                           | Y                | Y           | Y                                      | Y                | N               | N                   | Low          |
| [22]             | Yang        | ICD-10                         | Y                           | Y                | Y           | Y                                      | Y                | N               | N                   | Low          |
| [23]             | Zeng et     | ICD-10                         | Y                           | Y                | Y           | Y                                      | Y                | Y               | N                   | Low          |
| [35]             | Zhao        | ICD-10                         | Y                           | Y                | Y           | Y                                      | Y                | N               | N                   | Low          |
| [36]             | Liu et al.  | ICD-10                         | Y                           | Y                | Y           | Y                                      | Y                | N               | N                   | Low          |
| [3]              | Tao et al.  | ICD-10                         | Y                           | Y                | Y           | Y                                      | Y                | Y               | Y                   | Low          |
| [37]             | Huang et    | ICD-10                         | Y                           | Y                | Y           | Y                                      | Y                | N               | N                   | Low          |
| [23]             | Zeng et     | ICD-10                         | Y                           | Y                | Y           | Y                                      | Y                | Y               | N                   | Low          |
| [3]              | Tao et al.  | ICD-10                         | Y                           | Y                | Y           | Y                                      | Y                | Y               | Y                   | Low          |
| [38]             | Yu et al.   | ICD-10                         | Y                           | Y                | Y           | Y                                      | Y                | N               | N                   | Low          |
| [4]              | Wong et     | ICD-9                          | Y                           | Y                | Y           | Y                                      | Y                | N               | Y                   | Low          |
| [24]             | Qiu et al.  | ICD-10                         | Y                           | Y                | Y           | Y                                      | Y                | N               | N                   | Low          |
| [39]             | Wong et     | ICD-9                          | Y                           | Y                | Y           | Y                                      | Y                | Y               | Y                   | Low          |
| [40]             | Wong et     | ICD-9, ICD-                    | Y                           | Y                | Y           | Y                                      | Y                | Y               | Y                   | Low          |
| [41]             | Tsai et al. | ICD-9                          | Y                           | Y                | Y           | Y                                      | Y                | N               | N                   | Low          |
| [25]             | He et al.   | ICD-10                         | Y                           | Y                | Y           | Y                                      | Y                | N               | N                   | Low          |
| [40]             | Wong et     | ICD-9, ICD-                    | Y                           | Y                | Y           | Y                                      | Y                | Y               | Y                   | Low          |
| [42]             | Jia et al.  | ICD-9, ICD-                    | Y                           | Y                | Y           | Y                                      | Y                | N               | N                   | Low          |

<sup>1</sup>Meteorological Parameters: Refers to temperature and relative humidity in our study; <sup>2</sup>Day of week; <sup>3</sup>Yes; <sup>4</sup>No; <sup>5</sup>International Classification of Diseases

**Table S1** Quality assessment of included studies in the systematic review (continued)

| Number           | Author  | Diagnostic Evidence of Disease | Daily Pollutant Measurement | Long-term Trends | Seasonality | Meteorological Parameters <sup>1</sup> | DOW <sup>2</sup> | Public Holidays | Influenza Epidemics | Risk of Bias |
|------------------|---------|--------------------------------|-----------------------------|------------------|-------------|----------------------------------------|------------------|-----------------|---------------------|--------------|
| <b>Mortality</b> |         |                                |                             |                  |             |                                        |                  |                 |                     |              |
| [23]             | Zeng et | ICD-10 <sup>5</sup>            | Y <sup>3</sup>              | Y                | Y           | Y                                      | Y                | Y               | N <sup>4</sup>      | Low          |
| [5]              | Yang et | ICD-9                          | Y                           | Y                | Y           | Y                                      | Y                | N               | N                   | Low          |
| [23]             | Zeng et | ICD-10                         | Y                           | Y                | Y           | Y                                      | Y                | Y               | N                   | Low          |
| [43]             | Zhang   | ICD-10                         | Y                           | Y                | Y           | Y                                      | Y                | N               | N                   | Low          |
| [44]             | He      | ICD-10                         | Y                           | Y                | Y           | Y                                      | Y                | Y               | N                   | Low          |
| [23]             | Zeng et | ICD-10                         | Y                           | Y                | Y           | Y                                      | Y                | Y               | N                   | Low          |
| [40]             | Wong et | ICD-9,                         | Y                           | Y                | Y           | Y                                      | Y                | Y               | Y                   | Low          |
| [45]             | Qian et | ICD-9,                         | Y                           | Y                | Y           | Y                                      | Y                | N               | N                   | Low          |
| [23]             | Zeng et | ICD-10                         | Y                           | Y                | Y           | Y                                      | Y                | Y               | N                   | Low          |
| [3]              | Tao et  | ICD-10                         | Y                           | Y                | Y           | Y                                      | Y                | Y               | Y                   | Low          |
| [3]              | Tao et  | ICD-10                         | Y                           | Y                | Y           | Y                                      | Y                | Y               | Y                   | Low          |
| <b>Hospital</b>  |         |                                |                             |                  |             |                                        |                  |                 |                     |              |
| [7]              | Zhang   | ICD-10                         | Y                           | Y                | Y           | Y                                      | Y                | N               | N                   | Low          |
| [9]              | Liu     | ICD-10                         | Y                           | Y                | Y           | Y                                      | Y                | Y               | N                   | Low          |
| [6]              | Wong et | ICD-9                          | Y                           | Y                | Y           | Y                                      | Y                | Y               | N                   | Low          |
| [46]             | Lan     | ICD-10                         | Y                           | Y                | Y           | Y                                      | Y                | N               | N                   | Low          |
| [8]              | Tao     | ICD-10                         | Y                           | Y                | Y           | Y                                      | Y                | Y               | N                   | Low          |
| [47]             | Chen et | ICD-10                         | Y                           | Y                | Y           | Y                                      | Y                | Y               | N                   | Low          |
| [48]             | Bao et  | ICD-9,                         | Y                           | Y                | Y           | Y                                      | Y                | N               | N                   | Low          |
| [21]             | Wang et | ICD-10                         | Y                           | Y                | Y           | Y                                      | Y                | Y               | N                   | Low          |

<sup>1</sup>Meteorological Parameters: Refers to temperature and relative humidity in our study; <sup>2</sup>Day of week; <sup>3</sup>Yes; <sup>4</sup>No; <sup>5</sup>International Classification of Diseases.
